1 **Deficiency of gluconeogenic enzyme PCK1 promotes murine NASH**

2 **progression and fibrosis by activation PI3K/AKT/PDGF axis**

3 Qian Ye<sup>1,#</sup>, Yi Liu<sup>1,#</sup>, Guiji Zhang<sup>1,#</sup>, Haijun Deng<sup>1,#</sup>, Xiaojun Wang<sup>2,#</sup>, Chang

4 Chen<sup>3</sup>, Xuanming Pan<sup>1</sup>, Kang Wu<sup>1</sup>, Jiangao Fan<sup>4</sup>, Qin Pan<sup>4</sup>, Kai Wang<sup>1,\*</sup>,

5 Ailong Huang<sup>1,\*</sup>, Ni Tang<sup>1,\*</sup>

6

7 <sup>1</sup>Key Laboratory of Molecular Biology for Infectious Diseases (Ministry of

8 Education), Institute for Viral Hepatitis, Department of Infectious Diseases, The

9 Second Affiliated Hospital, Chongqing Medical University, Chongqing, China

10 <sup>2</sup>Institute of Hepatobiliary Surgery, Southwest Hospital, Third Military Medical

11 University (Army Medical University), Chongqing, China

12 <sup>3</sup>Institute of Life Sciences, Chongqing Medical University, Chongqing, China

13 <sup>4</sup>Department of Gastroenterology, Xin Hua Hospital, School of Medicine,

14 Shanghai Jiao Tong University, Shanghai, China

15 <sup>#</sup>These authors contributed equally to this work.

16 **\*Corresponding author:** Ni Tang, Ailong Huang, Kai Wang, Key Laboratory of

17 Molecular Biology for Infectious Diseases (Ministry of Education), Institute for

18 Viral Hepatitis, Department of Infectious Diseases, The Second Affiliated

19 Hospital, Chongqing Medical University, Chongqing 400016, China. Tel:

20 86-23-68486780, Fax: 86-23-68486780, E-mail: nitang@cqmu.edu.cn (N.T.),

21 ahuang@cqmu.edu.cn (A.H.), wangkai@cqmu.edu.cn (K.W.)

22

23 **Abstract:**

24 **Background and Aims:**

25 Nonalcoholic steatohepatitis (NASH) is a chronic liver disease characterized  
26 by hepatic lipid accumulation, inflammation, and progressive fibrosis. However,  
27 the pathomechanisms underlying NASH are incompletely explored.

28 Phosphoenolpyruvate carboxykinase 1 (PCK1) catalyzes the first rate-limiting  
29 step of gluconeogenesis. This study was designed to determine the role of  
30 PCK1 in regulating NASH progression.

31 **Methods:**

32 Liver metabolism, hepatic steatosis, and fibrosis were evaluated at 24 weeks  
33 in liver-specific *Pck1*-knockout mice fed with NASH diet or chow diet. Gain- or  
34 loss-of-function approaches were used to explore the underlying mechanism *in*  
35 *vitro*. AKT and RhoA inhibitors were evaluated for NASH treatment *in vivo*.

36 **Results:**

37 Hepatic PCK1 was downregulated in patients with NASH and mouse models  
38 of NASH. Mice with liver *Pck1* deficiency displayed hepatic lipid disorder and  
39 liver injury fed with normal diet, while showed aggravated fibrosis and  
40 inflammation when fed NASH diet. Mechanistically, PCK1 deficiency  
41 upregulated genes involved in fatty acid transport and lipid droplet formation.  
42 Moreover, metabolomics analysis showed the accumulation of glycerol  
43 3-phosphate, the substrate of triglyceride synthesis. Furthermore, the loss of  
44 hepatic PCK1 could activate the RhoA/PI3K/AKT pathway, which leads to

45 increased secretion of PDGF-AA and promotes the activation of hepatic  
46 stellate cells. Accordingly, treatment with RhoA and AKT inhibitors alleviated  
47 NASH progression in the presence of *Pck1* deletion *in vivo*.

48 **Conclusions:**

49 PCK1 deficiency plays a key role in the development of hepatic steatosis and  
50 fibrosis by facilitating the RhoA/PI3K/AKT/PDGF-AA axis. These findings  
51 provide a novel insight into therapeutic approaches for the treatment of NASH.

52

53 **Keywords:** phosphoenolpyruvate carboxykinase 1; gluconeogenesis;  
54 non-alcoholic steatohepatitis; PI3K/AKT pathway; platelet-derived growth  
55 factor AA

56

57 **Introduction**

58 Non-alcoholic fatty liver disease (NAFLD) is the most common chronic liver  
59 disease worldwide affecting nearly 25% of U.S. and European adults.<sup>1</sup> NAFLD  
60 is characterized by aberrant lipid accumulation in hepatocytes in the absence  
61 of excessive alcohol consumption. NAFLD may progress to non-alcoholic  
62 steatohepatitis (NASH), a more serious form of liver damage hallmarked by  
63 irreversible pathological changes such as inflammation, varying degrees of  
64 fibrosis, and hepatocellular damage, which is more likely to develop into  
65 cirrhosis and hepatocellular carcinoma (HCC).<sup>2</sup> Although multiple parallel  
66 insults, including oxidative damage, endoplasmic reticulum stress, and hepatic  
67 stellate cell (HSC) activation have been proposed to explain the pathogenesis  
68 of NASH, the underlying mechanisms remain incompletely elucidated.<sup>3</sup>

69

70 Gluconeogenesis is the process of generating glucose from non-carbohydrate  
71 substrates such as glycerol, lactate, pyruvate, and glucogenic amino acids,  
72 which occurs mainly in the liver to maintain glucose levels and energy  
73 homeostasis. Phosphoenolpyruvate carboxykinase 1 (PCK1) is the first  
74 rate-limiting enzyme in the gluconeogenesis which converts oxaloacetate  
75 (OAA) to phosphoenolpyruvate (PEP) in the cytoplasm.<sup>4</sup> Our previous studies  
76 have shown that PCK1 deficiency promotes HCC progression by enhancing  
77 the hexosamine-biosynthesis pathway.<sup>5</sup> However, PCK1 has been found to  
78 regulate not only glucose homeostasis but also lipogenesis by activating sterol

79 regulatory element-binding proteins (SREBPs).<sup>6</sup> Patients lacking PCK1  
80 function present diffuse hepatic macrosteatosis concomitant with  
81 hypoglycemia and hyperlactacidemia.<sup>7</sup> Likewise, mice with reduced *Pck1*  
82 expression develop insulin resistance and exhibit hypoglycemia as well as  
83 hepatic steatosis, indicating an important role of PCK1 in regulating both  
84 glucose homeostasis and lipid metabolism.<sup>8,9</sup> However, the exact role of  
85 PCK1 during NASH progression is incompletely understood.

86  
87 The phosphoinositide 3-kinase/protein kinase B (PI3K/AKT) pathway plays a  
88 critical role in regulating cell growth and metabolism. This pathway can be  
89 activated in response to insulin, growth factors, energy, and cytokines, and in  
90 turn, regulates key metabolic processes, including glucose and lipid  
91 metabolism, as well as protein synthesis.<sup>10</sup> AKT promotes *de novo* lipogenesis  
92 (DNL) primarily through SREBP activation.<sup>11</sup> PI3K/AKT dysregulation leads to  
93 many pathological metabolic conditions, including obesity and type 2  
94 diabetes.<sup>12</sup> NAFLD is characterized by disordered glucose and lipid  
95 metabolism in liver. Although PI3K/AKT pathway is a key regulator for sensing  
96 metabolic stress, its exact role in NAFLD/NASH progression is unclear.<sup>13, 14</sup>

97  
98 In this study, we explored the role of *Pck1* in a mouse NASH model. We  
99 unraveled the molecular mechanisms underlying disordered lipid metabolism,  
100 inflammation, and fibrosis induced by *Pck1* depletion. We also delineated the

- 101 functional importance of the PI3K/AKT pathway and its effectors in
- 102 steatohepatitis, providing a potential therapeutic strategy for treating NASH.

103 **Materials and Methods**

104 ***Animal models.***

105 *Pck1*<sup>loxp/loxp</sup> mice with a 129S6/SvEv background were purchased from the  
106 Mutant Mouse Resource & Research Centers (MMRRC: 011950-UNC) and  
107 *Alb-Cre* mice with a C57BL/6 background were purchased from Model Animal  
108 Research Center of Nanjing University. To generate liver-specific  
109 *Pck1*-knockout mice (L-KO), *Alb-Cre* mice were crossed with *Pck1*<sup>loxp/loxp</sup> mice.  
110 *Pck1*<sup>loxp/loxp</sup> mice from the same breeding were used as control (wild-type, WT).  
111 Male WT and L-KO mice, 7-9-week-old, were fed NASH diet (Research Diets,  
112 D12492: 60% Kcal fat, with drinking water containing 23.1 g/L fructose and  
113 18.9 g/L glucose) (n=11 per group) or a control chow diet (Research Diets,  
114 D12450J: 10% Kcal fat, with tap water) (n=10 per group) for 24 weeks. Food  
115 and drinking water were provided *ad libitum*. All mice were housed in  
116 temperature-controlled (23°C) pathogen-free facilities with a 12-hour light-dark  
117 cycle. For the male L-KO mice in the treatment group, after fed with NASH diet  
118 for 16 weeks, mice were divided into 3 groups and intraperitoneally (*i.p.*)  
119 injected with vehicle solution (n=6), MK2206 (AKT inhibitor, 50 mg/kg, every 3  
120 days) (n=5) or Rhosin (RhoA inhibitor, 20 mg/kg, every 3 days) (n=6) for 8  
121 weeks, respectively. All mice were executed for further study after fed with  
122 NASH diet for 24 weeks. Animal experiments were approved by Animal  
123 Experimentation Ethics Committees of Chongqing Medical University and  
124 were carried out in accordance with the Guide for the Care and Use of

125 Laboratory Animals.

126

127 Liver tissues collection, ELISA, immunoblotting, transcriptomic analyses,

128 untargeted metabolomics, primer sequences, reagents, antibodies,

129 ChIP-qPCR, and other *in vitro* studies are provided in the **Supplementary**

130 **Materials and Methods.**

131



132 **Results**

133 **PCK1 is downregulated in patients with NASH and mouse models of**  
134 **NASH**

135 To determine whether PCK1 is involved in NAFLD, we first examined hepatic  
136 gene expression in a published transcriptome dataset (GEO: GSE126848)  
137 containing samples from 14 healthy, 12 obese, 15 NAFLD, and 16 NASH  
138 patients.<sup>15</sup> Bioinformatics analysis showed that 32 genes were markedly  
139 changed in obesity, NAFLD, and NASH; 12 genes were considerably  
140 downregulated and 20 genes were upregulated ([Supplementary Figure 1A-C](#)).  
141 Notably, *PCK1* was gradually reduced in obesity, NAFLD, and NASH patients  
142 ([Figure 1A and B](#)). Downregulation of *PCK1* mRNA was also found in a similar  
143 dataset (GSE89632) ([Figure 1B](#)). Moreover, q-PCR, immunoblotting, and  
144 immunohistochemistry (IHC) assays showed that PCK1 expression were  
145 dramatically downregulated in liver samples derived from NASH patients and  
146 NASH model mice ([Figure 1C-E](#)).

147

148 Next, palmitic acid (PA) was used to mimic the liver steatosis of NAFLD  
149 patients *in vitro*.<sup>16</sup> Cell growth was assessed by CCK8 assay after treatment  
150 with different concentration of PA ([Supplementary Figure 1D](#)). Interestingly,  
151 PCK1 mRNA and protein levels were downregulated in a dose-dependent  
152 manner during 24-hour PA stimulation ([Figure 1F and G](#)), suggesting that  
153 transcription of PCK1 may be inhibited in response to lipid overload. We

154 screened several known regulators of *PCK1* ([Supplementary Figure 1E and F](#))  
155 and determined *ATF3*, a transcriptional repressor of *PCK1*,<sup>17</sup> was upregulated  
156 upon PA stimulation ([Figure 1H](#)). Similarly, *ATF3* expression was remarkably  
157 upregulated in liver samples derived from NASH patients and NASH model  
158 mice ([Supplementary Figure 1G-I](#)). Chromatin immunoprecipitation assays  
159 revealed that the binding of *ATF3* to *PCK1* promoter was increased by PA  
160 administration ([Figure 1I](#)). *ATF3* knockdown restored the expression of *PCK1*  
161 in human hepatocytes under PA treatment ([Figure 1J](#)). These results indicate  
162 that increased lipids caused upregulation of the repressor *ATF3*, impairing  
163 *PCK1* transcription in NASH patients and mouse models.

164

### 165 **L-KO mice exhibit a distinct hepatic steatosis phenotype**

166 To explore the role of *Pck1* in fatty liver disease, WT and L-KO mice were fed  
167 with chow diet for 24 weeks ([Supplementary Figure 2A](#)). From 16 weeks, L-KO  
168 mice showed increased body weight compared with WT mice, however, there  
169 was no significant difference in the glucose tolerance test (GTT) and insulin  
170 tolerance test (ITT) ([Supplementary Figure 2B](#)). Moreover, significant  
171 hepatomegaly and increased liver weight were observed in L-KO mice  
172 ([Supplementary Figure 2C](#)). Alanine transaminase (ALT) and aspartate  
173 transaminase (AST) levels were higher in L-KO mice, indicating liver injury  
174 ([Supplementary Figure 2D](#)). In addition, total triglyceride (TG), total cholesterol  
175 (TC), and free fatty acids (FFAs) in liver tissues and serum were elevated in

176 L-KO mice ([Supplementary Figure 2E and F](#)). Histochemistry and ELISA  
177 showed that L-KO mice exhibited prominent hepatic steatosis and higher  
178 levels of TNF- $\alpha$  ([Supplementary Figure 2G-I](#)). These data suggest that L-KO  
179 mice exhibited a distinct hepatic steatosis phenotype and liver injury even  
180 when fed normal chow.

181

182 **Hepatic loss of *Pck1* promotes inflammation and fibrogenesis in NASH**  
183 **mice**

184 To explore whether an unhealthy diet could exacerbate the pathologic  
185 changes in L-KO mice, WT and L-KO mice were fed with high-fat diet with  
186 drinking water containing fructose and glucose (NASH diet) for 24 weeks  
187 ([Figure 2A](#)).<sup>18, 19</sup> From 4 weeks, L-KO mice showed significant weight gain  
188 ([Figure 2B](#)). GTT and ITT showed that L-KO mice developed a more severe  
189 form of glucose intolerance and insulin resistance ([Figure 2C and D](#)). L-KO  
190 mice had pale and heavier livers ([Figure 2E](#)), although there was no significant  
191 difference in liver weight ratio ([Supplementary Figure 3A](#)). Insulin, AST, ALT,  
192 TC, TG, and FFAs were increased in serum or liver homogenates of L-KO  
193 mice, suggesting more serious liver injury and lipid metabolism disorder  
194 ([Figure 2F; Supplementary Figure 3B and C](#)). Analyses of L-KO liver sections  
195 revealed increased fat droplets, more severe fibrosis, and greater macrophage  
196 infiltration ([Figure 2G and H](#)). Furthermore, L-KO mice had higher NAFLD  
197 activity score (NAS score), and higher TNF- $\alpha$  and IL-6 levels ([Figure 2I and J](#)).

198 In addition, the expression of inflammatory factors, lipogenic enzymes, and  
199 fibrogenesis associated genes were upregulated in L-KO mice  
200 ([Supplementary Figure 3D-F](#)). In summary, mice lacking hepatic *Pck1* showed  
201 substantial liver inflammation and fibrosis when fed NASH diet.

202

203 **Transcriptomic and metabolomics analyses confirm loss of *Pck1***  
204 **promotes hepatic lipid accumulation**

205 To comprehensively investigate the role of *Pck1* in NASH, we performed  
206 RNA-seq analysis of liver samples from L-KO and WT mice fed normal chow  
207 or NASH diet for 24 weeks. Gene ontology analysis indicated that lipid  
208 metabolic processes were remarkably upregulated in L-KO mice fed with  
209 NASH diet ([Figure 3A](#)). Volcano plot showed that genes involved in fatty acid  
210 uptake, such as *Slc27a1* and *Cd36*, and lipid droplet synthesis, such as *Cidec*  
211 and *Cidea*, were upregulated in response to NASH diet ([Figure 3B](#)). Gene Set  
212 Enrichment Analysis (GSEA) revealed that the PPAR signaling pathway was  
213 prominently upregulated in L-KO mice fed either diet ([Figure 3C](#);  
214 [Supplementary Figure 4A and B](#)). Several genes selected from the data set  
215 were independently validated by q-PCR and immunoblotting and found to be  
216 significantly overexpressed in L-KO mice ([Figure 3D and E](#)). Furthermore,  
217 genes involved in the glycerol 3-phosphate (G3P) pathway were also  
218 upregulated in L-KO mice ([Figure 3F](#)). Metabolomics analysis showed that  
219 compared with WT mice fed NASH diets, L-KO mice had significantly higher

220 G3P and PA levels ([Figure 3G and H](#)). Since G3P is a substrate for TG  
221 synthesis and PA is a key intermediate metabolite in DNL, these data  
222 suggested that *Pck1* ablation could promote the substrates accumulation for  
223 lipid synthesis.

224

225 To further examine the function of PCK1 on steatosis *in vitro*, we  
226 overexpressed (*PCK1-OE*) using the AdEasy adenoviral vector system and  
227 knocked out PCK1 (*PCK1-KO*) using the CRISPR-Cas9 system in human  
228 hepatocytes ([Supplementary Figure 4C and D](#)), and found that *PCK1-OE*  
229 attenuated the accumulation of lipid droplets, whereas *PCK1-KO* facilitated  
230 lipid accumulation ([Supplementary Figure 4E and F](#)). Collectively, these results  
231 suggested that hepatic *Pck1* deficiency leads to lipid accumulation by  
232 promoting the expression of lipogenic genes and the accumulation of  
233 substrates related to lipid synthesis ([Supplementary Figure 4G](#)).

234

### 235 **Hepatic *Pck1* deficiency leads to HSC activation via PI3K/AKT pathway**

236 RNA-seq analysis indicated that the PI3K/AKT pathway was also specifically  
237 activated in L-KO mice fed NASH diet ([Figure 4A and B](#)). Immunoblotting  
238 revealed p-AKT (S473) and p-AKT (T308), two activated forms of AKT, and  
239 downstream c-MYC were significantly upregulated in L-KO livers ([Figure 4C](#)).

240 Consistently, q-PCR also confirmed the high expression of genes related to  
241 PI3K/AKT pathway in L-KO mice ([Supplementary Figure 5A](#)). Similarly, p-AKT

242 (S473 and T308) significantly decreased in human *PCK1*-OE cells, but  
243 increased in *PCK1*-KO cells after 0.2 mM PA treatment ([Figure 4D and E](#)).

244

245 To clarify the role of PI3K/AKT pathway activation, transcriptome data were  
246 further analyzed. Interestingly, *Col1a1*, *Col3a1*, and *Lama2*, which are primary  
247 components of the extracellular matrix (ECM), were upregulated as shown in  
248 the heat map of the PI3K/AKT pathway ([Supplementary Figure 5B](#)). Moreover,  
249 GSEA analysis revealed that ECM-receptor interaction was upregulated in  
250 L-KO mice ([Supplementary Figure 5C](#)). Since ECM deposition is usually  
251 considered as the key event underlying liver fibrosis, we suspected that  
252 activation of the PI3K/AKT pathway may promote fibrosis in L-KO mice.

253 Considering HSCs are major ECM secretors, we performed human hepatocyte  
254 (MIHA) and HSC (LX-2) co-culture assays ([Figure 4F](#)). Interestingly, mRNA  
255 levels of *ACTA2* ( $\alpha$ -SMA, an HSC activation marker), *COL1A1*, and *COL3A1*  
256 were increased in HSCs co-cultured with *PCK1*-KO cells, but were decreased  
257 in HSCs co-cultured with *PCK1*-OE cells ([Figure 4G and H](#)). Likewise,  
258 *COL1A1*, *COL3A1*, and  $\alpha$ -SMA expression was increased in liver tissues and  
259 primary HSCs of L-KO mice, which was confirmed by IHC analysis of *COL3A1*  
260 ([Figure 4I-K](#)). However, these increases could be partially reversed by  
261 MK2206, an AKT inhibitor ([Figure 4L and M](#)). Collectively, these data  
262 suggested that loss of *PCK1* in hepatocytes induces HSCs activation and ECM  
263 formation via activating the PI3K/AKT pathway.

264

265 **Paracrine PDGF-AA from hepatocytes promotes HSC activation**

266 Hepatocytes elicit several fibrogenic actions in a paracrine fashion to promote  
267 the activation of HSCs.<sup>20</sup> Thus, PCK1-mediated hepatic fibrosis may be  
268 involved in paracrine disorders. To test this hypothesis, several pro-fibrotic  
269 factors were screened, and *Pdgfa* was significantly elevated in liver tissues of  
270 L-KO mice (Figure 5A). Bioinformatics analysis confirmed that *PDGFA* were  
271 significantly increased in NAFLD and NASH patients (Figure 5B). *Pdgfa*  
272 encodes a dimer disulfide-linked polypeptide (PDGF-AA), and the chronic  
273 elevation of PDGF-AA in mice liver induces fibrosis.<sup>21</sup> Immunoblotting and  
274 ELISA demonstrated increased PDGF-AA expression in liver tissues and  
275 primary hepatocytes of L-KO mice (Figure 5C-E). Moreover, PDGF-AA  
276 concentration was markedly increased in the culture medium of *PCK1-KO*  
277 cells, but decreased in that of *PCK1-OE* cells treated with 0.2 mM PA (Figure  
278 5F). Correspondingly, platelet-derived growth factor receptor alpha (*PDGFRA*),  
279 which encodes the PDGF-AA receptor, was increased in HSCs co-cultured  
280 with *PCK1-KO* cells, while decreased in HSCs co-cultured with *PCK1-OE* cells  
281 (Figure 5G). To determine whether the pro-fibrogenic effect was mediated by  
282 PDGF-AA secretion, we used a neutralizing antibody against PDGF-AA. As  
283 expected, the increase of  $\alpha$ -SMA, COL1A1, and COL3A1 in HSCs co-cultured  
284 with *PCK1-KO* cells can be reversed by anti-PDGF-AA treatment (Figure 5H).

285

286 Reviewing transcriptome data, we found that *Pdgfa* appeared in the heat map  
287 of the PI3K/AKT pathway ([Supplementary Figure 5B](#)). IHC results showed that  
288 p-AKT (S473) was positively correlated with PDGF-AA ([Figure 5I](#)). The AKT  
289 inhibitor MK2206 significantly blocked the increase of *PDGFA* expression  
290 levels in the supernatants and cells lysates of *PCK1*-KO cells ([Figure 5J and](#)  
291 [K](#)). Taken together, these data confirmed that *PCK1* deficiency promoted the  
292 expression of PDGF-AA through the PI3K/AKT pathway, and activated HSCs  
293 through hepatocyte-HSC crosstalk.

294

295 **PCK1 deficiency promotes the activation of the PI3K/AKT/PDGF-AA axis**  
296 **by activating RhoA signaling in hepatocytes**

297 Rho GTPases, which cycle between active GTP-bound and inactive  
298 GDP-bound conformations, are known to activate the PI3K/AKT pathway.<sup>22-24</sup>  
299 Considering *PCK1* catalyzes the conversion of OAA to PEP, consuming GTP  
300 to generate GDP, we speculated that *PCK1* deficiency may alter intracellular  
301 GTP homeostasis. To test this hypothesis, we examined several Rho GTPase  
302 protein levels in mice liver tissues and found that GTP-bound RhoA  
303 significantly increased but inactivated RhoA, p-RhoA (S188) reduced in L-KO  
304 mice ([Figure 6A-6C](#)). Consistently, after PA treatment, levels of GTP-bound  
305 RhoA decreased but p-RhoA (S188) expression increased in *PCK1*-OE cells,  
306 while *PCK1*-KO cells displayed the opposite effects ([Figure 6D-6G](#)). Next,  
307 Rhosin was used to determine whether PI3K/AKT activation is dependent on



308 RhoA. Immunoblotting, ELISA, and q-PCR assays showed that Rhosin  
309 blocked the increase of activated forms of AKT and PDGF-AA in *PCK1*-KO cell  
310 lysate and supernatant, as well as *ACTA2*, *COL1A1*, and *COL3A1* expression  
311 in HSCs co-cultured with *PCK1*-KO hepatocytes (Figure 6H-J). Moreover,  
312 PCK1 and p-RhoA (S188) were downregulated in NASH patient samples,  
313 while p-AKT (S473) and PDGF-AA levels were upregulated (Figure 6K). Taken  
314 together, these data indicate that PCK1 ablation stimulated the  
315 PI3K/AKT/PDGF-AA axis by activating RhoA.

316

317 **Therapeutic treatment with RhoA and AKT inhibitors reduced**  
318 **progressive liver fibrosis *in vivo***

319 To explore whether blocking RhoA/PI3K/AKT could rescue the NASH  
320 phenotype in L-KO mice, Rhosin and MK2206 were used *in vivo* (Figure 7A).  
321 Treatment of L-KO mice with Rhosin or MK2206 showed improved glucose  
322 intolerance (Supplementary Figure 6A) and insulin resistance (Supplementary  
323 Figure 6B). Furthermore, the increased liver weight was also prevented  
324 (Figure 7B), whereas body weight was reduced only in the MK2206 treatment  
325 group (Supplementary Figure 6C). Additionally, Rhosin or MK2206  
326 administration attenuated AST and ALT levels, as well as TG and FFA levels in  
327 serum and liver tissues (Figure 7C; Supplementary Figure 6D and E). Similarly,  
328 histochemistry showed reduced liver steatosis, inflammation, and fibrosis in  
329 Rhosin or MK2206 treated mice (Figure 7D; Supplementary Figure 6F), which

330 was confirmed by decline in liver TNF- $\alpha$  and IL-6 levels ([Figure 7E](#)).

331 Additionally,  $\alpha$ -SMA, COL1A1, COL3A1, PDGF-AA, p-AKT (S473, T308)

332 expression and GTP-bound RhoA levels were also decreased, while the

333 expression of p-RhoA (S188) was increased in treatment group ([Figure 7F](#);

334 [Supplementary Figure 6G](#)). MK2206 or Rhosin treatment also reduced the

335 expression of genes related to inflammation and fibrosis ([Figure 7G](#)). These

336 data suggested that the RhoA/PI3K/AKT axis plays a key role in NASH

337 progression in L-KO mice.

338 **Discussion**

339 This study revealed that the hepatic gluconeogenic enzyme PCK1 plays an  
340 important role in NASH progression. The expression of PCK1 was diminished  
341 in livers from patients or mice with NASH. Moreover, deletion of PCK1  
342 significantly exacerbated hepatic steatosis, fibrosis, and inflammation in  
343 mouse models fed NASH diet. Mechanistically, loss of PCK1 not only  
344 promotes steatosis by enhancing lipid deposition, but also induces fibrosis by  
345 HSC activation via the PI3K/AKT/PDGF-AA axis, thus promoting the  
346 progression of NASH.

347

348 Abnormal lipid metabolism is a characteristic of NAFLD and NASH. Previous  
349 studies assumed that altered lipid homeostasis was usually caused by  
350 abnormal expression of genes related to lipid metabolism.<sup>25</sup> However, recent  
351 studies have demonstrated that disruption of gluconeogenesis also leads to  
352 abnormal lipid metabolism. Deficiency of fructose-1,6-bisphosphatase 1 (FBP1)  
353 and glucose-6-phosphatase catalytic subunit (G6PC), key enzymes of  
354 gluconeogenesis, results in severe hepatic steatosis and hypoglycemia,  
355 indicating that suppression of gluconeogenesis could also disrupt lipid  
356 homeostasis.<sup>26, 27</sup> As the first rate-limiting enzyme in gluconeogenesis, it is  
357 currently not clear whether PCK1 plays a critical role in NAFLD/NASH  
358 development. In this study, we identified a robust decrease in PCK1  
359 expression in the livers of NASH mice and NAFLD/NASH patients, causing

360 severe hepatic steatosis and confirming that disordered hepatic

361 gluconeogenesis can affect lipid homeostasis.

362

363 Previous reports have shown that PCK1 expression is increased in several

364 obesity/diabetes mouse models, such as ZDF rats, *ob/ob* and *db/db* mice, and

365 the disease progression of NASH is positively correlated with obesity and type

366 2 diabetes mellitus (T2DM).<sup>28-30</sup> Interestingly, we found that PCK1 expression

367 was down-regulated in diet-induced murine NASH model. Such a discrepancy

368 might be due to the differences in animal models. The widely used rodent

369 models of genetic forms of obesity and diabetes, such as *ob/ob* and *db/db*

370 mice, have increased plasma glucocorticoids, which may drive PCK1

371 expression.<sup>30, 31</sup> Another explanation is that high-fat diet supplemented with

372 high fructose/glucose in drinking water is capable of suppressing PCK1

373 expression, which is consistent with the previous report.<sup>32</sup> Furthermore, we

374 identified ATF3, a member of the basic leucine zipper (bZIP) family of

375 transcription factors,<sup>33</sup> transcriptionally repressed *PCK1* upon PA overload *in*

376 *vitro* or in NASH mouse model. This is in line with previous studies suggesting

377 that ATF3 was upregulated in NAFLD patients and murine NASH model, and

378 could inhibit the expression of PCK1 in alcoholic fatty liver disease.<sup>16, 34, 35</sup>

379 Therefore, in the current study, we found that PCK1 markedly decreased in

380 NASH, and PA inhibited *PCK1* transcription via the upregulation of ATF3.

381

382 Accumulating studies using PCK1 agonists or whole-body *Pck1* knockdown  
383 mice have verified that PCK1 may affect lipid metabolism.<sup>36, 37</sup> In the present  
384 study, we found that liver-specific *Pck1* knockout induced significant hepatic  
385 steatosis even under normal feeding conditions. This is a very important  
386 phenomenon, since it is uncommon for a single gene ablation to cause  
387 spontaneous steatosis unless a high-fat diet is used. Moreover, we observed  
388 that mice with liver *Pck1* deficiency showed aggravated inflammation when fed  
389 high-fat high-fructose diet, which was completely different from a previous  
390 study showing that whole-body *Pck1* knockdown prevented hepatic  
391 inflammation.<sup>38</sup> We speculate that this discrepancy is possibly due to  
392 differences between diet plan and animal models, since whole-body *Pck1*  
393 knockdown may have unforeseen effects on glucolipid metabolism.

394

395 Lipid accumulation is the essence of steatosis. Emerging evidence has  
396 indicated that increased fatty acid uptake is associated with lipid  
397 accumulation.<sup>39, 40</sup> In this study, genes involved in fatty acid uptake such as  
398 *Cd36* and *Slc27a1* were highly expressed in L-KO mice. In addition, *Cidec*, a  
399 lipid droplet-associated protein that promotes their formation, was increased  
400 by both chow and NASH diets, and recently it was claimed to upregulated in  
401 NALFD patients and mice, suggesting that PCK1 ablation also promotes lipid  
402 droplet formation.<sup>41, 42</sup> Abnormal levels of metabolites also contribute to TG  
403 accumulation in liver. The G3P pathway contributes to over 90% of TG

404 synthesis.<sup>43</sup> Since our metabolomics data showed that G3P and PA were  
405 significantly upregulated in L-KO mice, we propose that PCK1 deficiency  
406 promotes hepatic lipid accumulation by enhancing the expression of *Cd36*,  
407 *Slc27a1*, and *Cidec* and the levels of metabolic substrates such as G3P and  
408 PA. However, the exact mechanism by which PCK1 regulates G3P pathway  
409 and the expression levels of *Cd36*, *Slc27a1* remains to be further explored.

410

411 Fibrosis is another characteristic of NASH and drives the transition from simple  
412 steatosis to NASH. Activation of HSCs through the secretion of profibrotic  
413 cytokines, such as TGF- $\beta$  and PDGF, is a key event in liver fibrosis.<sup>44</sup> A recent  
414 study identified high mobility group protein B1 (HMGB1), secreted by  
415 FBP1-deficient hepatocytes, as the main mediator to activate HSCs, showing  
416 the important crosstalk between hepatocytes and HSCs via paracrine  
417 signaling.<sup>26</sup> Herein, we found that PDGF-AA was secreted by PCK1-deficient  
418 hepatocytes and acted in a paracrine manner to activate HSCs. Increased  
419 deposition of extracellular matrix and activation of HSCs were shown in  
420 PDGFA-transgenic mice, however, the underlying mechanism mediating  
421 PDGF-AA upregulation in fibrosis remains unclear.<sup>21</sup> Here, we demonstrated  
422 that PCK1 deficiency promoted PDGF-AA secretion via activation of the  
423 RhoA/PI3K/AKT pathway. Mechanistically, we hypothesize that PCK1 deletion  
424 may increase intracellular GTP levels, thus promoting the activation of RhoA  
425 and further activating the PI3K/AKT pathway. Based on our *in vitro* findings,

426 we used pharmacological AKT and RhoA inhibitors, MK2206 and Rhosin  
427 respectively, in L-KO NASH mice. Hepatic steatosis, fibrosis, and inflammation  
428 were significantly attenuated in treated mice. Although RhoA and AKT  
429 inhibitors are currently only in phase 3 trials or preclinical studies for the  
430 treatment of liver fibrosis or clinical tumors, these compounds may also have a  
431 promising therapeutic potential for NASH.<sup>45-47</sup>

432

433 In conclusion, this study demonstrated that hepatic PCK1 deficiency could  
434 promote lipid deposition and fibrosis in murine NASH model. Moreover,  
435 hepatic PCK1 loss activates the RhoA/PI3K/AKT pathway, which increases  
436 secretion of PDGF-AA and promotes HSC activation. AKT/RhoA inhibitors  
437 could reduce progressive liver fibrosis, providing a therapeutic window for  
438 NASH treatment.

439 **Acknowledgements**

440 We would like to thank Dr. T.-C He (University of Chicago, USA) and Prof. Ding  
441 Xue (Tsinghua University, China) for providing the pAdEasy and CRISPR/Cas9  
442 system, respectively. We thank Prof. Youde Cao and Yalan Wang (Chongqing  
443 Medical University, China) for providing samples and pathological analysis  
444 support.

445

446 **Grant support:** This work was supported by the National Natural Science  
447 Foundation of China (grant no. U20A20392, 82073251, 82072286, 81872270),  
448 the 111 Project (No. D20028), the Natural Science Foundation Project of  
449 Chongqing (cstc2018jcyjAX0254, cstc2019jscx-dxwtBX0019,  
450 cstc2019jcyj-msxmX0587), the Major National S&T program  
451 (2017ZX10202203-004), the Leading Talent Program of CQ CSTC  
452 (CSTCCXLJRC201719), the Science and Technology Research Program of  
453 Chongqing Municipal Education Commission (KJZD-M202000401,  
454 KJQN201900429, CY200406), the Kuanren talents program of the second  
455 affiliated hospital of Chongqing Medical University, and the Scientific Research  
456 Innovation Project for Postgraduate in Chongqing (CYB19168, CYS19193).

457

458 **Conflict of interest:** The authors disclose no conflicts.

459

460 **Transcript Profiling:** Raw data were deposited in the GEO database



461 (GSE162211).

462

463 **Author contributions:** NT, AH, and KW conceived and designed the study.

464 QY, YL and GZ performed most experiments and analyzed the data. HD, CC

465 and KW conducted bioinformatics analysis. XP assisted with mice experiments.

466 XW, JF, and QP provided human NAFLD/NASH samples. QY, KW, and NT

467 wrote the manuscript with all authors providing feedback. The order of the

468 co-first authors was assigned on the basis of their relative contributions to the

469 study.

470

471

472

473 **Abbreviations:**

474 AKT, protein kinase B; ALT, Alanine transaminase; AST, aspartate  
475 transaminase;  $\alpha$ -SMA, alpha-smooth muscle actin (ACTA2); ATF3, Activating  
476 Transcription Factor 3; bZIP, Basic Leucine Zipper; ChIP, chromatin  
477 immunoprecipitation; CIDEA and CIDEA, cell death inducing DFFA like  
478 effector C and A; COL1A1, COL1A3, recombinant collagen type I alpha 1 and  
479 alpha 3; CD36, fatty acid translocase; DNL, *de novo* lipogenesis; FFA, free  
480 fatty acid; G3P, glycerol 3-phosphate; GTT, glucose tolerance test; GSEA,  
481 Gene Set Enrichment Analysis; HE, hematoxylin and eosin; IHC,  
482 immunohistochemistry; ITT, insulin tolerance test; Lama2, laminin subunit  
483 alpha 2; L-KO, liver-specific *Pck1*-knockout mice; NASH, non-alcoholic  
484 steatohepatitis; NAFLD, non-alcoholic fatty liver disease; NAS, NAFLD activity  
485 score; PCK1, Phosphoenolpyruvate carboxykinase 1; PCK1,  
486 Phosphoenolpyruvate carboxykinase 1; PDGF-AA, platelet-derived growth  
487 factor AA; PI3K, phosphatidylinositol 3-kinase; PPAR, Peroxisome  
488 Proliferator-Activated Receptor; RhoA, Ras homolog family member A;  
489 SLC27A1, solute carrier family 27 member 1; TC, total cholesterol; TG,  
490 Triglyceride

491

492

493 **References**

- 494 1. Younossi Z, Anstee QM, Marietti M, et al. Global burden of NAFLD and  
495 NASH: trends, predictions, risk factors and prevention. *Nat Rev*  
496 *Gastroenterol Hepatol* 2018;15:11-20.
- 497 2. Schuster S, Cabrera D, Arrese M, et al. Triggering and resolution of  
498 inflammation in NASH. *Nat Rev Gastroenterol Hepatol*  
499 2018;15:349-364.
- 500 3. Arab JP, Arrese M, Trauner M. Recent Insights into the Pathogenesis of  
501 Nonalcoholic Fatty Liver Disease. *Annu Rev Pathol* 2018;13:321-350.
- 502 4. **Tuo L, Xiang J, Pan X**, et al. PCK1 negatively regulates cell cycle  
503 progression and hepatoma cell proliferation via the AMPK/p27(Kip1)  
504 axis. *J Exp Clin Cancer Res* 2019;38:50.
- 505 5. **Xiang J, Chen C, Liu R**, et al. Gluconeogenic enzyme PCK1 deficiency  
506 promotes CHK2 O-GlcNAcylation and hepatocellular carcinoma growth  
507 upon glucose deprivation. *J Clin Invest* 2021 Apr 15;131(8):144703.
- 508 6. **Xu D, Wang Z**, Xia Y, et al. The gluconeogenic enzyme PCK1  
509 phosphorylates INSIG1/2 for lipogenesis. *Nature* 2020;580:530-535.
- 510 7. Santra S, Cameron JM, Shyr C, et al. Cytosolic phosphoenolpyruvate  
511 carboxykinase deficiency presenting with acute liver failure following  
512 gastroenteritis. *Mol Genet Metab* 2016;118:21-7.
- 513 8. She P, Shiota M, Shelton KD, et al. Phosphoenolpyruvate  
514 carboxykinase is necessary for the integration of hepatic energy

- 515 metabolism. *Mol Cell Biol* 2000;20:6508-17.
- 516 9. Millward CA, Desantis D, Hsieh CW, et al. Phosphoenolpyruvate  
517 carboxykinase (Pck1) helps regulate the triglyceride/fatty acid cycle and  
518 development of insulin resistance in mice. *J Lipid Res* 2010;51:1452-63.
- 519 10. Hoxhaj G, Manning BD. The PI3K-AKT network at the interface of  
520 oncogenic signalling and cancer metabolism. *Nat Rev Cancer*  
521 2020;20:74-88.
- 522 11. Porstmann T, Griffiths B, Chung YL, et al. PKB/Akt induces transcription  
523 of enzymes involved in cholesterol and fatty acid biosynthesis via  
524 activation of SREBP. *Oncogene* 2005;24:6465-81.
- 525 12. Huang X, Liu G, Guo J, et al. The PI3K/AKT pathway in obesity and  
526 type 2 diabetes. *Int J Biol Sci* 2018;14:1483-1496.
- 527 13. Chen J, Chen J, Huang J, et al. HIF-2 $\alpha$  upregulation mediated by  
528 hypoxia promotes NAFLD-HCC progression by activating lipid synthesis  
529 via the PI3K-AKT-mTOR pathway. *Aging (Albany NY)*  
530 2019;11:10839-10860.
- 531 14. Chi Y, Gong Z, Xin H, et al. Long noncoding RNA lncARSR promotes  
532 nonalcoholic fatty liver disease and hepatocellular carcinoma by  
533 promoting YAP1 and activating the IRS2/AKT pathway. *J Transl Med*  
534 2020;18:126.
- 535 15. **Suppli MP, Rigbolt KTG, Veidal SS, et al.** Hepatic transcriptome  
536 signatures in patients with varying degrees of nonalcoholic fatty liver

- 537 disease compared with healthy normal-weight individuals. *Am J Physiol*  
538 *Gastrointest Liver Physiol* 2019;316:G462-g472.
- 539 16. **Fang J, Ji YX, Zhang P**, et al. Hepatic IRF2BP2 Mitigates Nonalcoholic  
540 Fatty Liver Disease by Directly Repressing the Transcription of ATF3.  
541 *Hepatology* 2020;71:1592-1608.
- 542 17. Allen-Jennings AE, Hartman MG, Kociba GJ, et al. The roles of ATF3 in  
543 liver dysfunction and the regulation of phosphoenolpyruvate  
544 carboxykinase gene expression. *J Biol Chem* 2002;277:20020-5.
- 545 18. Asgharpour A, Cazanave SC, Pacana T, et al. A diet-induced animal  
546 model of non-alcoholic fatty liver disease and hepatocellular cancer. *J*  
547 *Hepatol* 2016;65:579-88.
- 548 19. Liu XJ, Duan NN, Liu C, et al. Characterization of a murine nonalcoholic  
549 steatohepatitis model induced by high fat high calorie diet plus fructose  
550 and glucose in drinking water. *Lab Invest* 2018;98:1184-1199.
- 551 20. Kucukoglu O, Sowa JP, Mazzolini GD, et al. Hepatokines and  
552 adipokines in NASH-related hepatocellular carcinoma. *J Hepatol*  
553 2021;74:442-457.
- 554 21. **Thieringer F, Maass T**, Czochra P, et al. Spontaneous hepatic fibrosis  
555 in transgenic mice overexpressing PDGF-A. *Gene* 2008;423:23-8.
- 556 22. Higuchi M, Masuyama N, Fukui Y, et al. Akt mediates  
557 Rac/Cdc42-regulated cell motility in growth factor-stimulated cells and  
558 in invasive PTEN knockout cells. *Curr Biol* 2001;11:1958-62.

- 559 23. **Dou C, Liu Z, Tu K**, et al. P300 Acetyltransferase Mediates  
560 Stiffness-Induced Activation of Hepatic Stellate Cells Into  
561 Tumor-Promoting Myofibroblasts. *Gastroenterology*  
562 2018;154:2209-2221.e14.
- 563 24. **Calvayrac O, Mazières J**. The RAS-related GTPase RHOB confers  
564 resistance to EGFR-tyrosine kinase inhibitors in non-small-cell lung  
565 cancer via an AKT-dependent mechanism. *EMBO Mol Med*  
566 2017;9:238-250.
- 567 25. **Snaebjornsson MT, Janaki-Raman S, Schulze A**. Greasing the Wheels  
568 of the Cancer Machine: The Role of Lipid Metabolism in Cancer. *Cell*  
569 *Metab* 2020;31:62-76.
- 570 26. **Li F, Huangyang P, Burrows M**, et al. FBP1 loss disrupts liver  
571 metabolism and promotes tumorigenesis through a hepatic stellate cell  
572 senescence secretome. *Nature* 2020;22:728-739.
- 573 27. **Vily-Petit J, Soty-Roca M, Silva M**, et al. Intestinal gluconeogenesis  
574 prevents obesity-linked liver steatosis and non-alcoholic fatty liver  
575 disease. *Gut* 2020;69:2193-2202.
- 576 28. **Yoon JC, Puigserver P, Chen G**, et al. Control of hepatic  
577 gluconeogenesis through the transcriptional coactivator PGC-1. *Nature*  
578 2001;413:131-8.
- 579 29. **Friedman SL, Neuschwander-Tetri BA, Rinella M**, et al. Mechanisms of  
580 NAFLD development and therapeutic strategies. *Nat Med*

- 581 2018;24:908-922.
- 582 30. Samuel VT, Beddow SA, Iwasaki T, et al. Fasting hyperglycemia is not  
583 associated with increased expression of PEPCK or G6Pc in patients  
584 with Type 2 Diabetes. *Proc Natl Acad Sci U S A* 2009;106:12121-6.
- 585 31. Imai E, Stromstedt PE, Quinn PG, et al. Characterization of a complex  
586 glucocorticoid response unit in the phosphoenolpyruvate carboxykinase  
587 gene. *Mol Cell Biol* 1990;10:4712-9.
- 588 32. Lundsgaard AM, Holm JB, Sjøberg KA, et al. Mechanisms Preserving  
589 Insulin Action during High Dietary Fat Intake. *Cell Metab*  
590 2019;29:50-63.e4.
- 591 33. Hai T, Wolfgang CD, Marsee DK, et al. ATF3 and stress responses.  
592 *Gene Expr* 1999;7:321-35.
- 593 34. **Tu C, Xiong H, Hu Y**, et al. Cardiolipin Synthase 1 Ameliorates NASH  
594 Through Activating Transcription Factor 3 Transcriptional Inactivation.  
595 *Hepatology* 2020;72:1949-1967.
- 596 35. Tsai WW, Matsumura S, Liu W, et al. ATF3 mediates inhibitory effects of  
597 ethanol on hepatic gluconeogenesis. *Proc Natl Acad Sci U S A*  
598 2015;112:2699-704.
- 599 36. Gut P, Baeza-Raja B, Andersson O, et al. Whole-organism screening for  
600 gluconeogenesis identifies activators of fasting metabolism. *Nat Chem*  
601 *Biol* 2013;9:97-104.
- 602 37. Hakimi P, Johnson MT, Yang J, et al. Phosphoenolpyruvate

- 603 carboxykinase and the critical role of cataplerosis in the control of  
604 hepatic metabolism. *Nutr Metab (Lond)* 2005;2:33.
- 605 38. Satapati S, Kucejova B, Duarte JA, et al. Mitochondrial metabolism  
606 mediates oxidative stress and inflammation in fatty liver. *J Clin Invest*  
607 2015;125:4447-62.
- 608 39. Miquilena-Colina ME, Lima-Cabello E, Sánchez-Campos S, et al.  
609 Hepatic fatty acid translocase CD36 upregulation is associated with  
610 insulin resistance, hyperinsulinaemia and increased steatosis in  
611 non-alcoholic steatohepatitis and chronic hepatitis C. *Gut*  
612 2011;60:1394-402.
- 613 40. Doege H, Grimm D, Falcon A, et al. Silencing of hepatic fatty acid  
614 transporter protein 5 in vivo reverses diet-induced non-alcoholic fatty  
615 liver disease and improves hyperglycemia. *J Biol Chem*  
616 2008;283:22186-92.
- 617 41. Langhi C, Baldán Á. CIDEA/FSP27 is regulated by peroxisome  
618 proliferator-activated receptor alpha and plays a critical role in fasting-  
619 and diet-induced hepatosteatosis. *Hepatology* 2015;61:1227-38.
- 620 42. **Xu MJ, Cai Y, Wang H**, et al. Fat-Specific Protein 27/CIDEA Promotes  
621 Development of Alcoholic Steatohepatitis in Mice and Humans.  
622 *Gastroenterology* 2015;149:1030-41.e6.
- 623 43. Alves-Bezerra M, Cohen DE. Triglyceride Metabolism in the Liver.  
624 *Compr Physiol* 2017;8:1-8.



625 44. Tsuchida T, Friedman SL. Mechanisms of hepatic stellate cell activation.  
626 Nat Rev Gastroenterol Hepatol 2017;14:397-411.

627 45. Chien AJ, Tripathy D, Albain KS, et al. MK-2206 and Standard  
628 Neoadjuvant Chemotherapy Improves Response in Patients With  
629 Human Epidermal Growth Factor Receptor 2-Positive and/or Hormone  
630 Receptor-Negative Breast Cancers in the I-SPY 2 Trial. J Clin Oncol  
631 2020;38:1059-1069.

632 46. Schmid P, Abraham J, Chan S, et al. Capivasertib Plus Paclitaxel  
633 Versus Placebo Plus Paclitaxel As First-Line Therapy for Metastatic  
634 Triple-Negative Breast Cancer: The PAKT Trial. J Clin Oncol  
635 2020;38:423-433.

636 47. Yoon C, Cho SJ, Aksoy BA, et al. Chemotherapy Resistance in  
637 Diffuse-Type Gastric Adenocarcinoma Is Mediated by RhoA Activation  
638 in Cancer Stem-Like Cells. Clin Cancer Res 2016;22:971-83.

639

640 Author names in bold designate shared co-first authorship.

641 **Figure legends**

642 **Figure 1. PCK1 is downregulated in patients with NASH and mouse**

643 **models of NASH.** (A) Genes downregulated in patients with obesity (n=12),

644 NAFLD (n=15), and NASH (n=16) from GSE126848 dataset. (B) Relative

645 *PCK1* mRNA levels in GSE126848 and GSE89632 datasets. (C) *PCK1*

646 expression in normal individuals and patients with NASH. Scale bars: 50  $\mu$ m.

647 (D-E) mRNA and protein levels of *PCK1* in the livers of WT mice fed with chow

648 diet or NASH diet. (F-G) *PCK1* mRNA and protein levels in MIHA cells treated

649 with palmitic acid (PA) or BSA. (H) Relative levels of indicated genes in MIHA

650 cells treated with 0.2 mM PA. (I) ChIP assays were performed in MIHA cells

651 with or without PA treatment using an antibody against ATF3, IgG or H3. (J)

652 Protein levels of *PCK1* in MIHA cells infected with either shControl or shATF3

653 treated with 0.2 mM PA. Data expressed as mean  $\pm$  SEM; \* $P < 0.05$ , \*\*  $P <$

654 0.01, \*\*\* $P < 0.001$ .  $P$ -values obtained via 2-tailed unpaired Student's  $t$  tests or

655 one-way ANOVA with Tukey's post hoc test.

656 **Figure 2. PCK1 ablation accelerates inflammation and fibrogenesis in**  
657 **NASH model.** (A) Schematic diagram of mouse model fed with NASH diet.  
658 (B-D) Body weight, GTT, and ITT were measured in WT and L-KO mice (n=11).  
659 (E) Representative gross liver morphology, whole body photo, and liver weight.  
660 (F) Serum levels of insulin, ALT and AST were measured. (G)  
661 Paraffin-embedded liver sections were stained with H&E, Sirius Red,  $\alpha$ -SMA  
662 and F4/80. Frozen sections stained with Oil Red O. Scale bars: 50  $\mu$ m. (H)  
663 Quantifications of Oil red O staining, Sirius red staining, and IHC staining. (I)  
664 NAS scores of each group. (J) Levels of TNF- $\alpha$  and IL-6 in liver tissues were  
665 examined using ELISA (n=8). Data expressed as mean  $\pm$  SEM; \* $P < 0.05$ , \*\*  $P$   
666  $< 0.01$ , \*\*\* $P < 0.001$ .  $P$  values obtained via 2-tailed unpaired Student's t tests.

667 **Figure 3. Loss of PCK1 promotes lipid accumulation confirmed by**  
668 **transcriptome and metabolome.** RNA sequencing was performed on livers  
669 of WT and L-KO mice fed NASH diet (n=4-5). (A) Gene ontology analysis of all  
670 significantly changed genes in top 10 biological processes. (B) Volcano plot  
671 representation of significantly up- and downregulated genes. (C) GSEA plot  
672 (left) of enrichment in “PPAR signaling pathway” signature; Heatmap (right)  
673 presentation of significantly upregulated PPAR target genes. (D-E) q-PCR and  
674 immunoblot analysis of indicated genes or protein expression in mice liver  
675 tissues. (F) Relative mRNA expression of key genes in G3P pathway (n=8). (G)  
676 Upregulated metabolites detected by untargeted metabolomics (n=6). (H) The  
677 relative level of G3P and PA in mice liver tissues (n=6). Data expressed as  
678 mean  $\pm$  SEM; \* $P < 0.05$ , \*\*  $P < 0.01$ , \*\*\* $P < 0.001$ .  $P$  values obtained via  
679 2-tailed unpaired Student’s t tests.

680 **Figure 4. Hepatic PCK1 deficiency leads to HSC activation via PI3K/AKT**  
681 **pathway.** (A) Pathway enrichment analysis of significantly upregulated genes  
682 in L-KO mice. (B) GSEA plot of enrichment in PI3K/AKT pathway. (C-E)  
683 Immunoblot analysis of AKT and p-AKT (S473 or T308) in mice liver tissues or  
684 *PCK1*-OE and *PCK1*-KO MIHA cells with or without 0.2 mM PA treatment. (F)  
685 Schematic flow chart of co-culture models. (G-H) q-PCR analysis of fibrosis  
686 related gene in HSC (LX-2) cells co-cultured with *PCK1*-KO or *PCK1*-OE MIHA  
687 cells. (I-J) Western blot of fibrosis related protein in liver tissues or primary  
688 HSCs (n=3). (K) COL3A1 immunostaining in mice liver sections. Scale bars:  
689 50  $\mu$ m. (L-M) Relative mRNA expression and immunofluorescence images of  
690 *ACTA2*/ $\alpha$ -SMA, *COL1A1* and *COL3A1* in LX-2 cells co-cultured with *PCK1*-KO  
691 MIHA cells treated with AKT inhibitor MK2206 (10  $\mu$ M). Scale bars: 25  $\mu$ m.  
692 Data expressed as mean  $\pm$  SEM; \* $P$  < 0.05, \*\*  $P$  < 0.01, \*\*\* $P$  < 0.001.  $P$  values  
693 obtained via 2-tailed unpaired Student's t tests or one-way ANOVA with  
694 Tukey's post hoc test.  
695

696 **Figure 5. Paracrine PDGF-AA from hepatocytes promotes HSC activation.**

697 (A) Expression levels of genes related to fibrogenesis. (B) Relative *PDGFA*  
698 mRNA levels in GSE126848 and GSE89632 datasets. (C-D) PDGF-AA protein  
699 levels in liver tissue detected by Western blot and ELISA. (E) PDGF-AA protein  
700 levels in primary hepatocytes (n=3). (F) Secreted PDGF-AA levels in the  
701 conditional medium of *PCK1-KO* or *PCK1-OE* MIHA cells with 0.2mM PA  
702 treatment. (G) mRNA levels of *PDGFRA* in cell lysate of LX-2 co-cultured with  
703 *PCK1-KO* or *PCK1-OE* MIHA cells treated with PA. (H) Indicated protein level  
704 in LX-2 cells co-cultured with *PCK1-KO* MIHA cells containing nonspecific  
705 rabbit IgG or a PDGF-AA blocking antibody. (I) IHC analysis of PCK1, p-AKT  
706 (S473) and PDGF-AA in mice liver sections. Scale bars: 50  $\mu$ m. (J) Levels of  
707 PDGF-AA or *PDGFA* in the conditional medium or cell lysate of *PCK1-KO*  
708 MIHA cells treated with AKT inhibitor MK2206 (10  $\mu$ M). (K) Indicated protein  
709 levels in *PCK1-KO* MIHA cells treated with AKT inhibitor MK2206 (10  $\mu$ M).  
710 Data expressed as mean  $\pm$  SEM; \* $P < 0.05$ , \*\*  $P < 0.01$ , \*\*\* $P < 0.001$ .  $P$  values  
711 obtained via 2-tailed unpaired Student's t tests or one-way ANOVA with  
712 Tukey's post hoc test.

713 **Figure 6. PCK1 deficiency promotes the activation of PI3K/AKT/PDGF-AA**  
714 **axis by activating RhoA in hepatocytes.** (A) Immunoblotting analysis of  
715 indicated protein in mice liver tissues. (B) IHC analysis of p-RhoA (S188) in  
716 mice liver tissues. Scale bars: 50  $\mu$ m. (C-E) Relative levels of active RhoA  
717 were measured by G-LISA in mice liver tissues, *PCK1*-OE and *PCK1*-KO  
718 MIHA cells treated with 0.2 mM PA. (F-G) Immunoblots of p-RhoA (S188) and  
719 RhoA in *PCK1*-OE and *PCK1*-KO MIHA cells with or without 0.2 mM PA  
720 treatment. (H) Expression of indicated proteins in *PCK1*-KO MIHA cells after  
721 addition of Rhosin (30  $\mu$ M). (I) Levels of PDGF-AA in the supernatant of  
722 *PCK1*-KO MIHA cells treated with Rhosin (30  $\mu$ M). (J) Relative mRNA  
723 expression of *ACTA2*, *COL1A1*, and *COL3A1* in LX-2 cells co-cultured with  
724 *PCK1*-KO MIHA cells treated with Rhosin (30  $\mu$ M). (K) IHC analysis of PCK1,  
725 p-RhoA (S188), p-AKT (S473), and PDGF-AA in normal individuals and  
726 patients with NASH. Scale bars: 50  $\mu$ m. Data expressed as mean  $\pm$  SEM; \* $P$  <  
727 0.05, \*\*  $P$  < 0.01, \*\*\* $P$  < 0.001.  $P$  values obtained via one-way ANOVA with  
728 Tukey's post hoc test.

729 **Figure 7. AKT and RhoA inhibitors prevent the development of NASH *in***  
730 ***vivo*.** L-KO mice were fed NASH diet for 24 weeks, and therapeutic treatment  
731 with AKT or RhoA inhibitor was initiated at 16 weeks. (A) Schematic diagram of  
732 L-KO mice treated with DMSO (n=6), Rhosin (n=6) or MK2206 (n=5). (B-C)  
733 Representative whole body, gross liver morphology, liver weight, and serum  
734 ALT and AST. (D) Paraffin-embedded liver sections were stained with HE, or  
735 immunostained for F4/80, COL3A1 and  $\alpha$ -SMA. Frozen sections stained with  
736 Oil Red O. Scale bars: 50  $\mu$ m. (E) Levels of TNF- $\alpha$ , IL-6 in liver tissues. (F)  
737 Expression of indicated protein in mice liver tissues. (G) mRNA levels of genes  
738 associated with lipid metabolism, fibrogenesis, and inflammatory infiltration.  
739 Data expressed as mean  $\pm$  SEM; \* $P < 0.05$ , \*\*  $P < 0.01$ , \*\*\* $P < 0.001$ ; n.s., not  
740 statistically significant.  $P$  values obtained via one-way ANOVA with Tukey's  
741 post hoc test.



# Figure 1

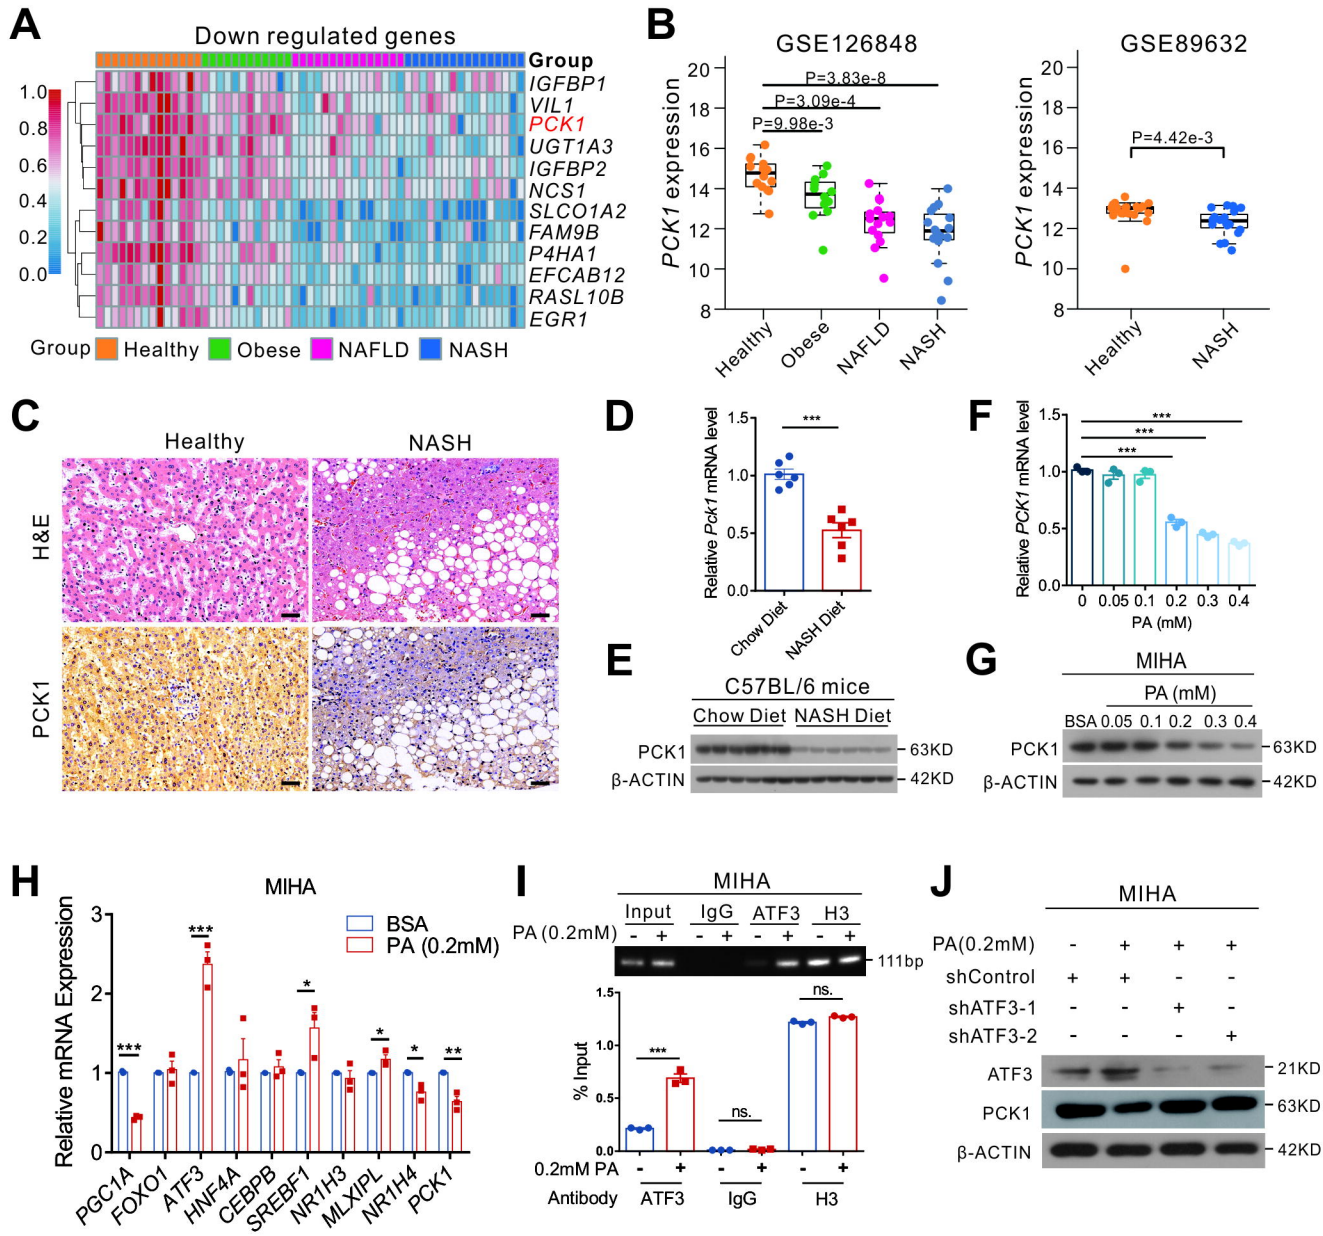

# Figure 2

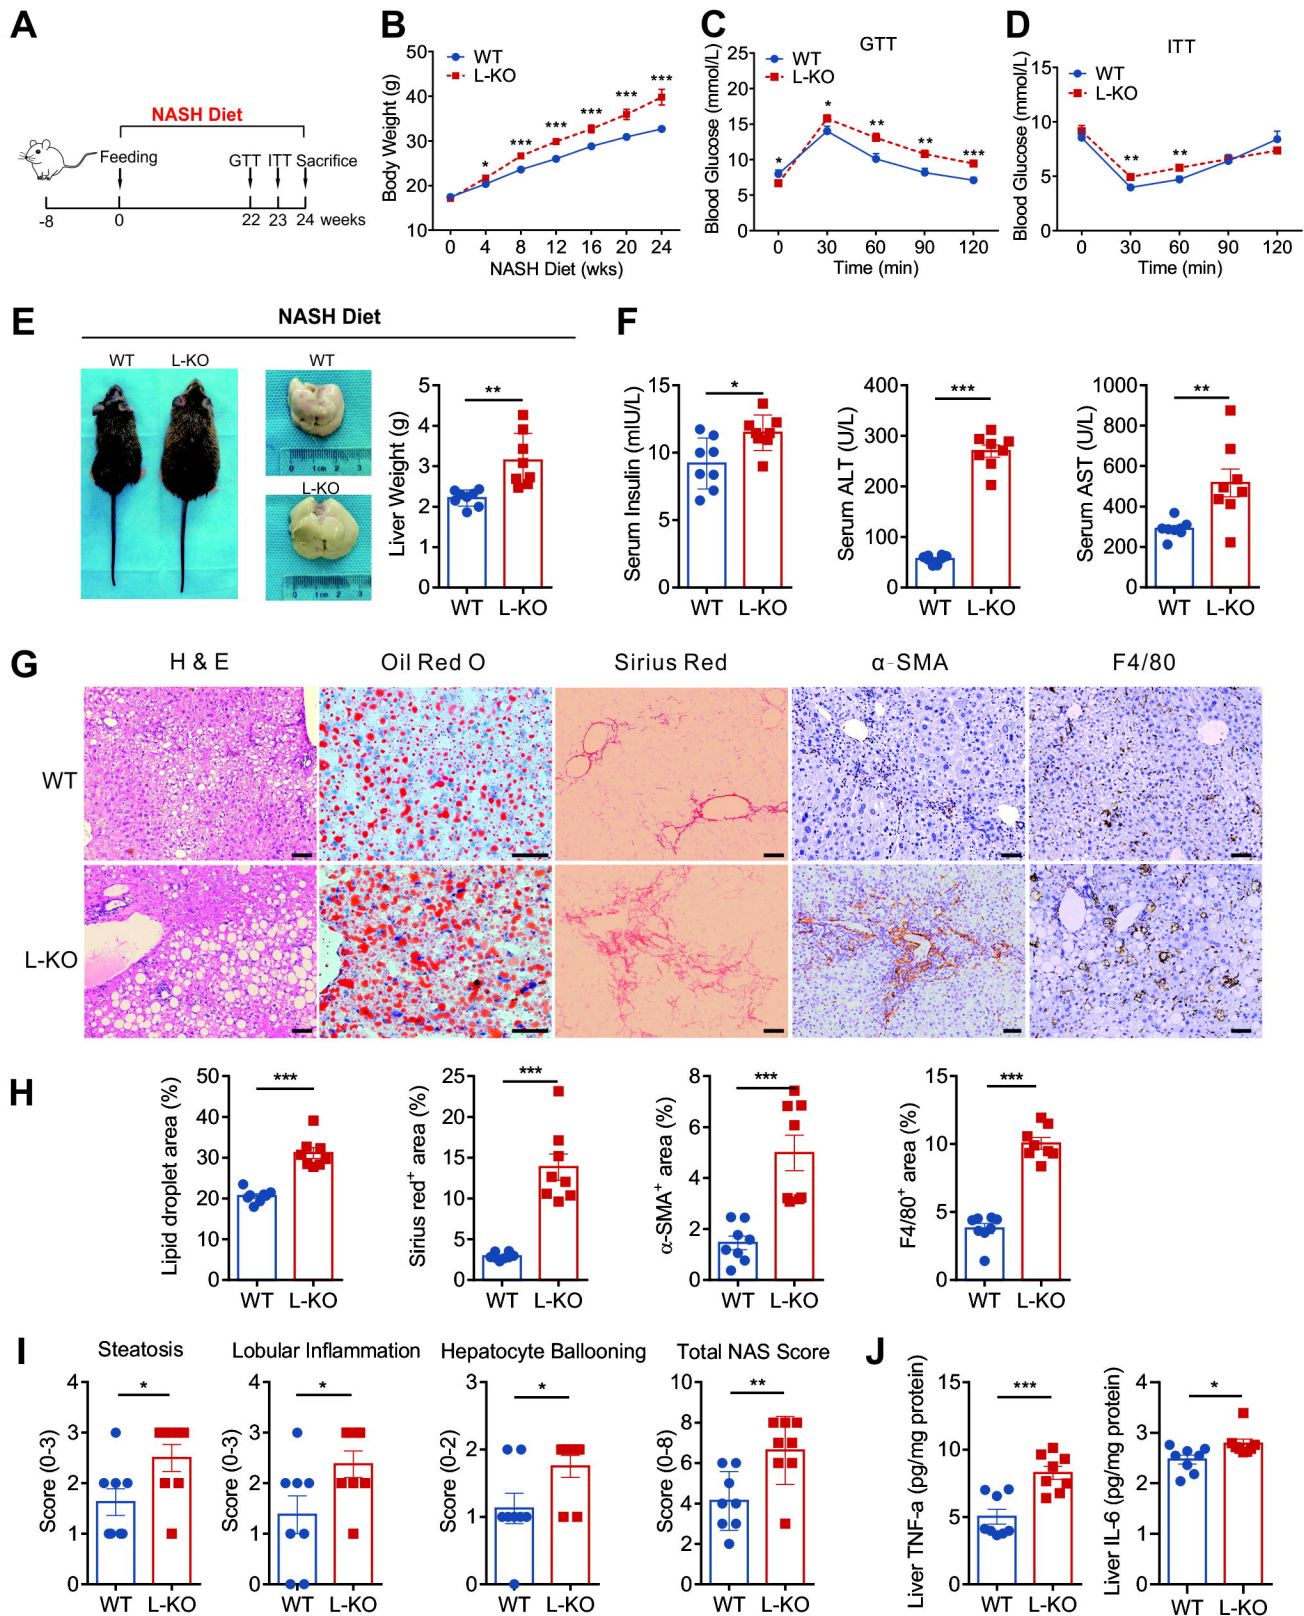

# Figure 3

## A

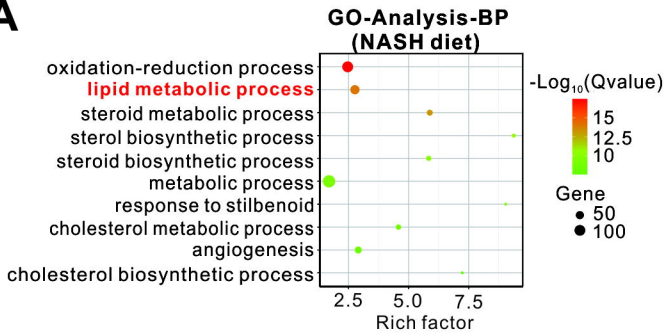

## B

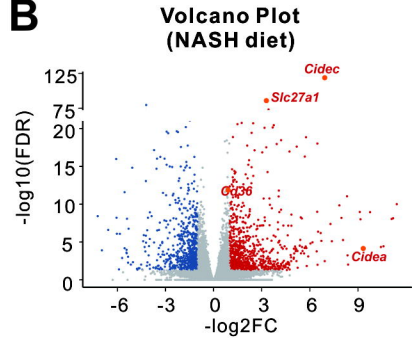

## C

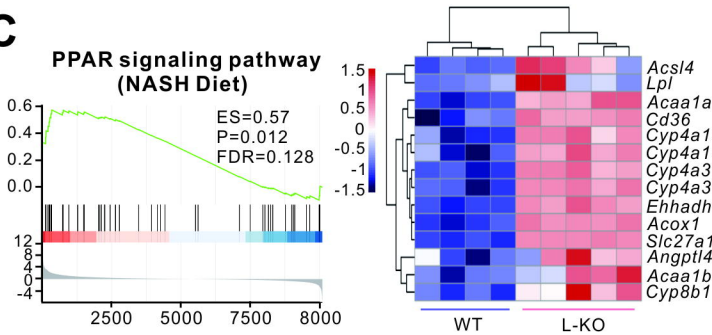

## D

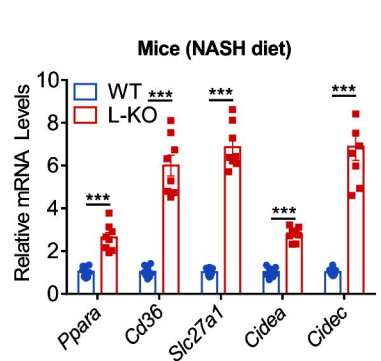

## E

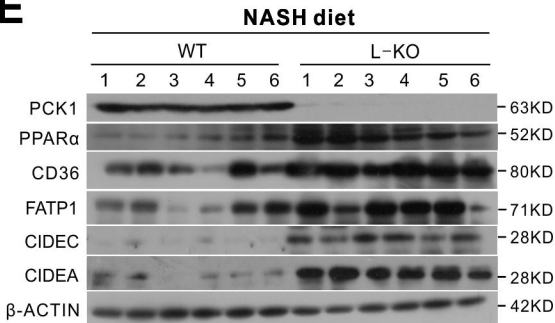

## F

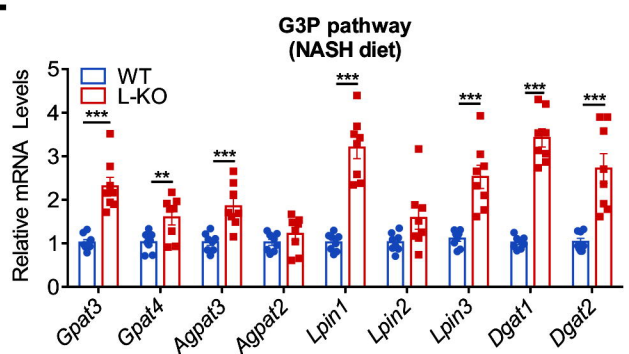

## G

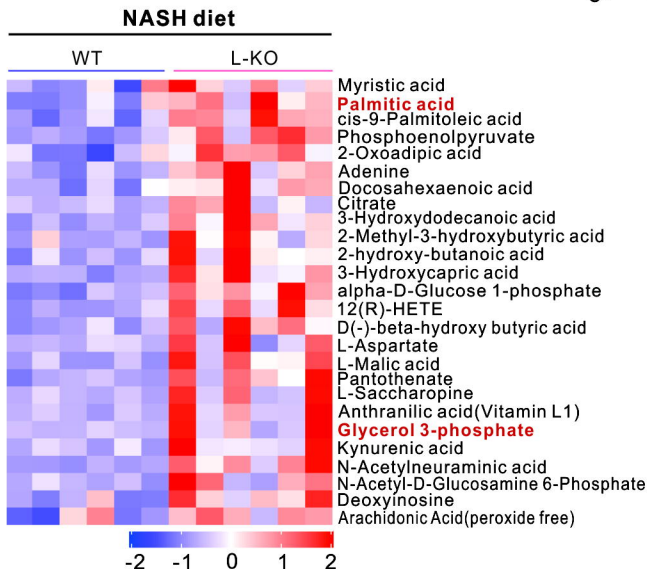

## H

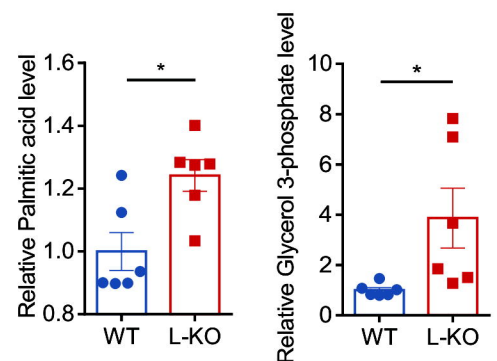

# Figure 4

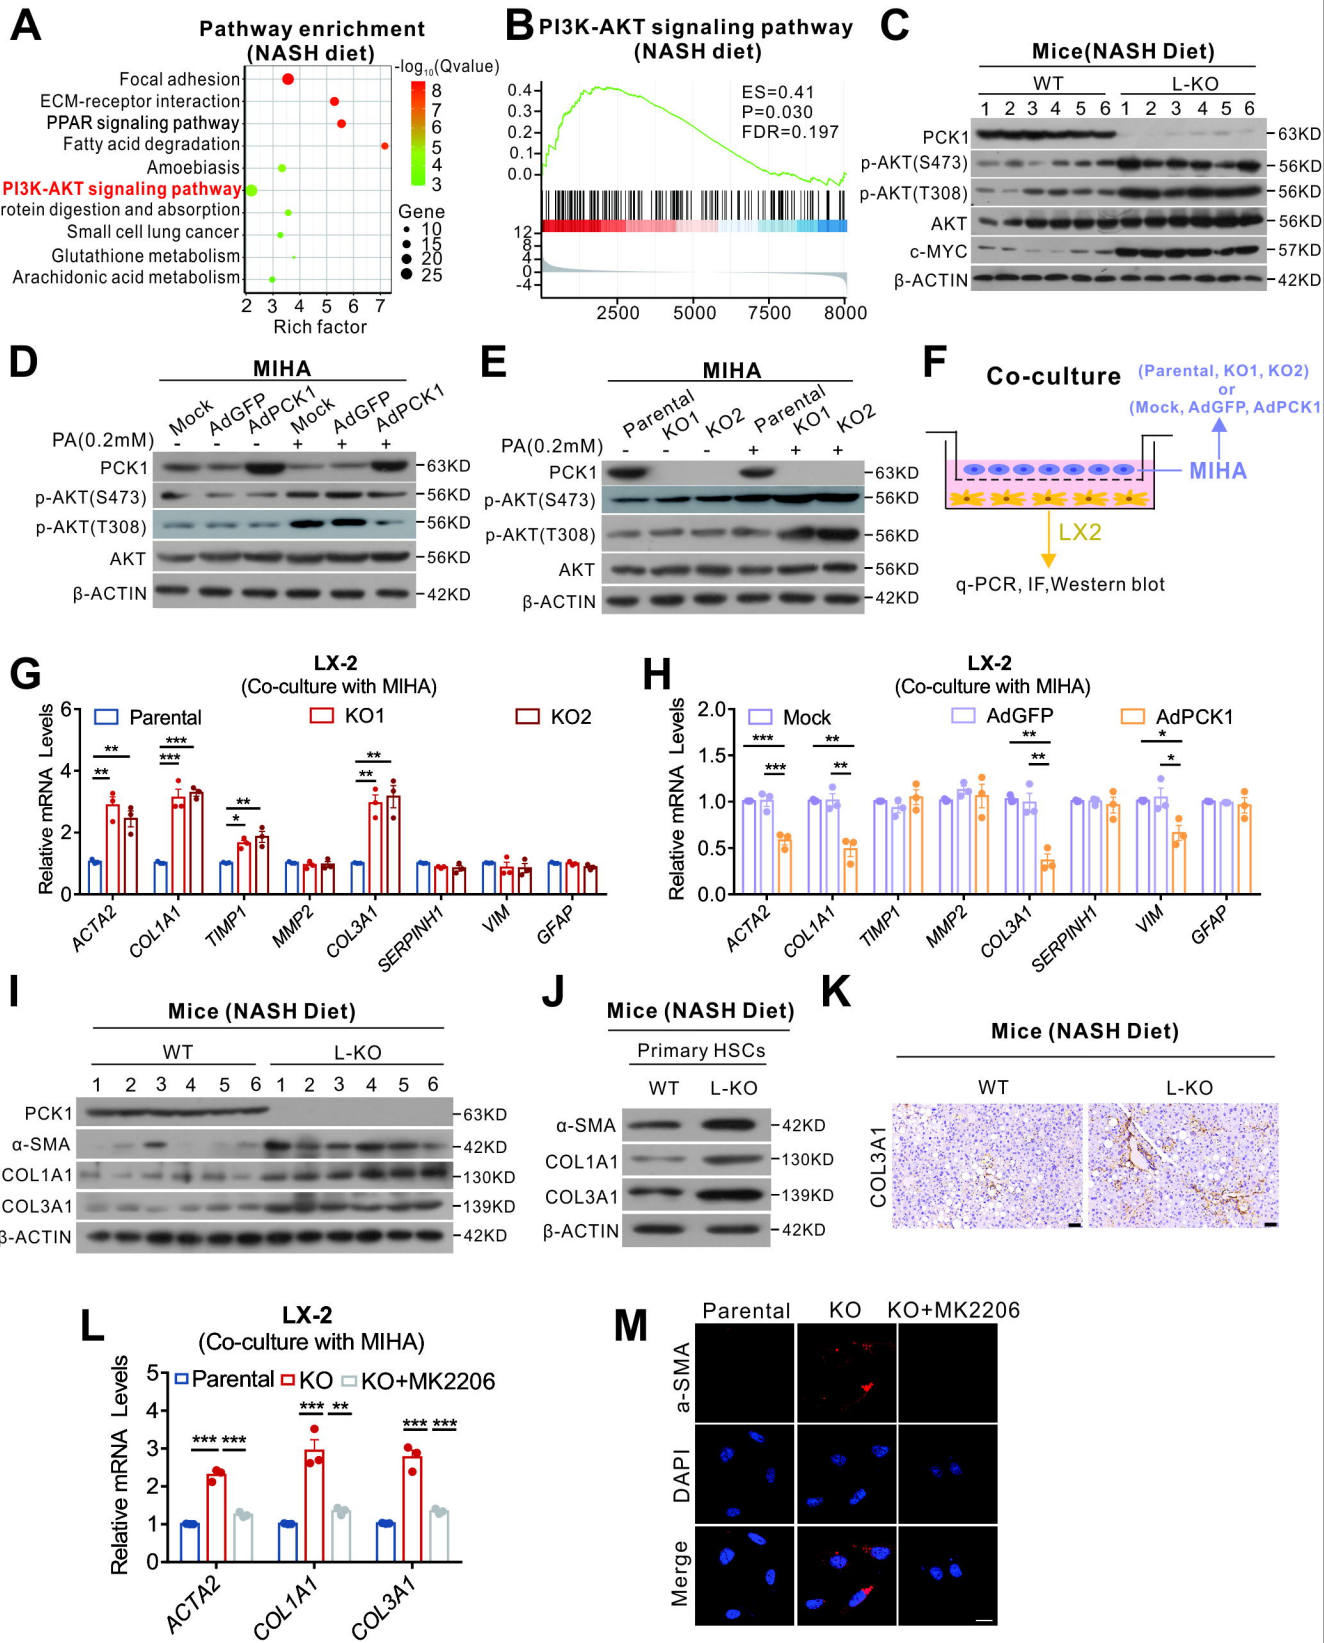

# Figure 5

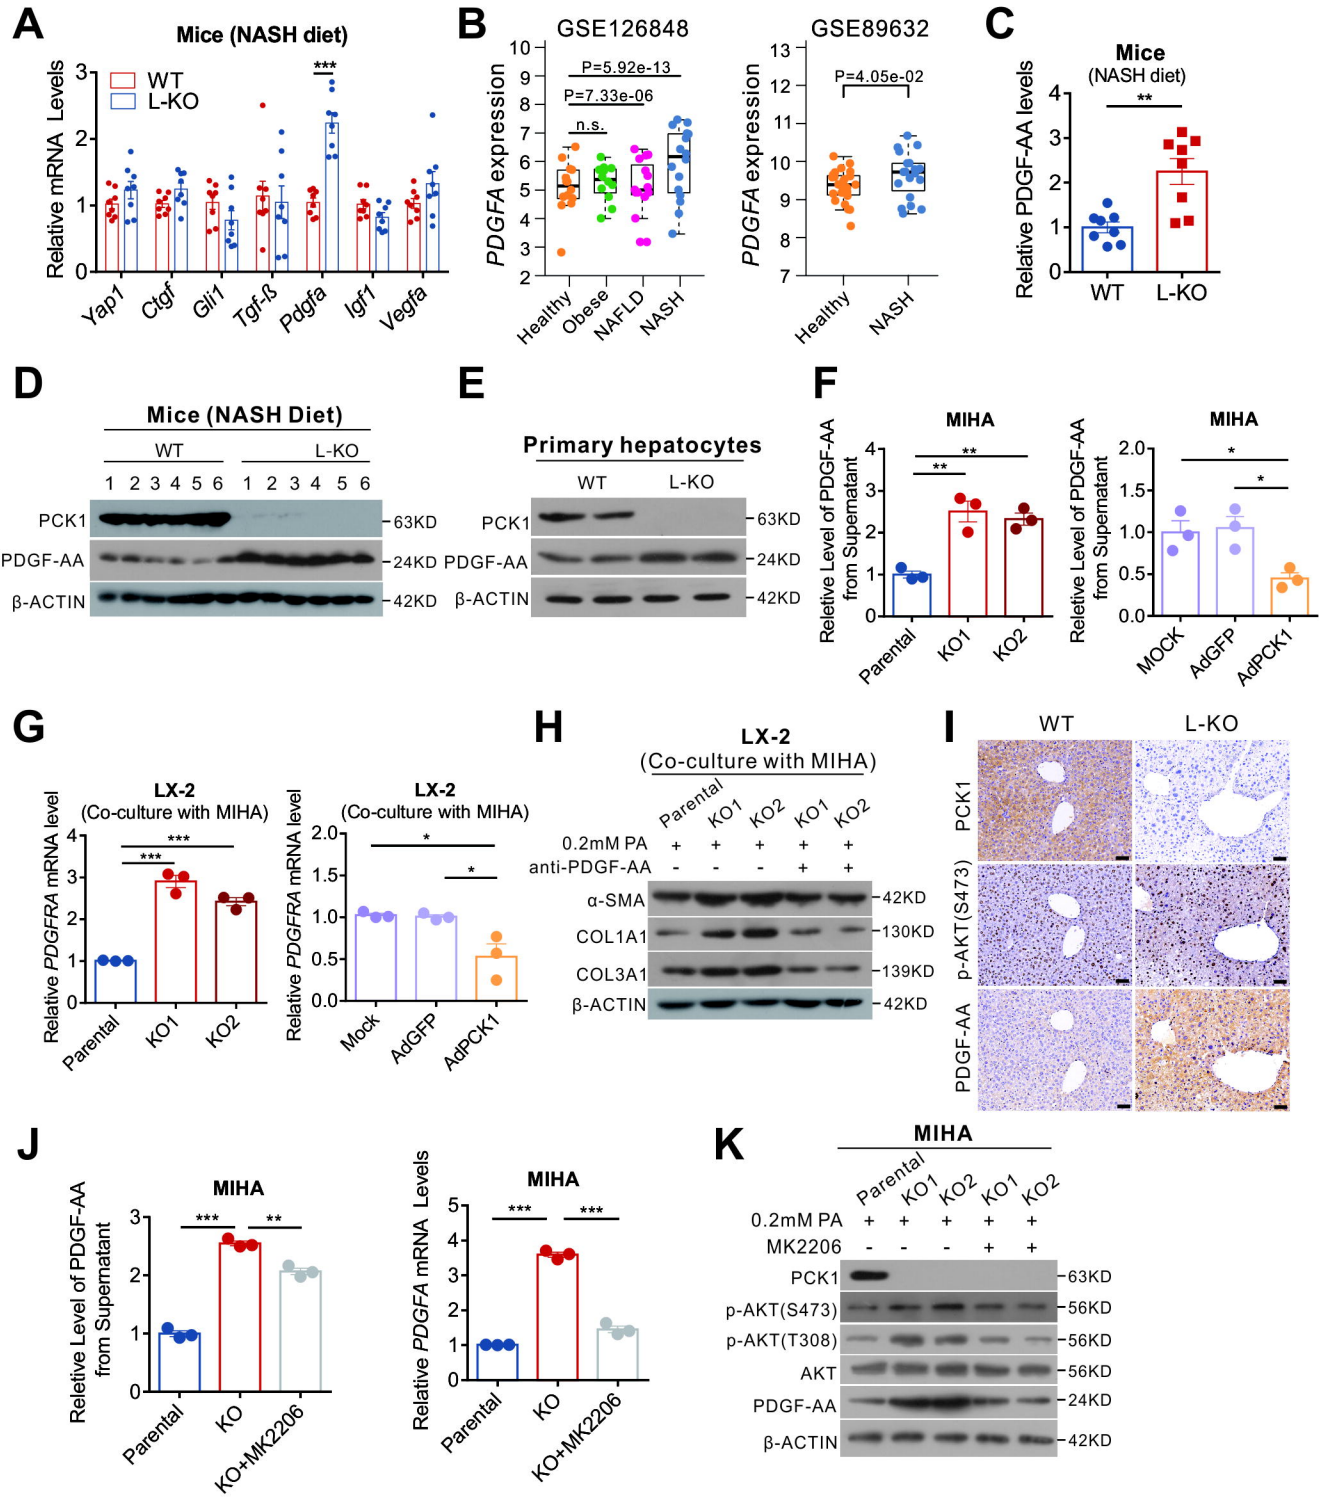

# Figure 6

## A

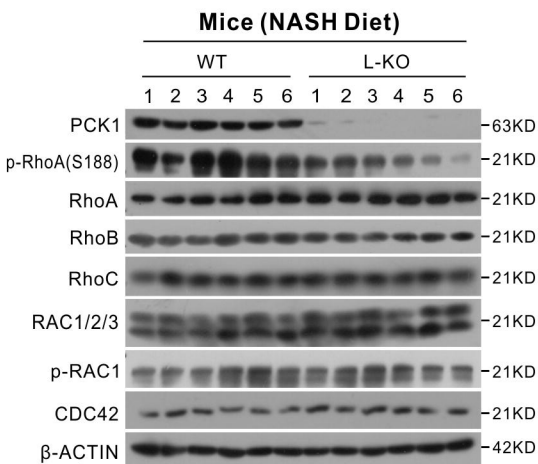

## B

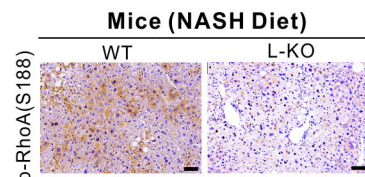

## C

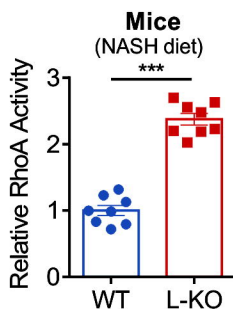

## D

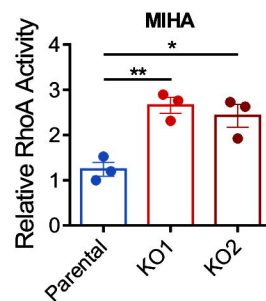

## E

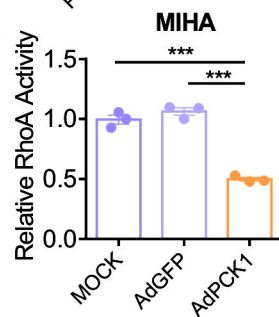

## F

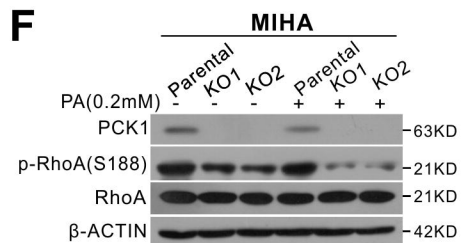

## G

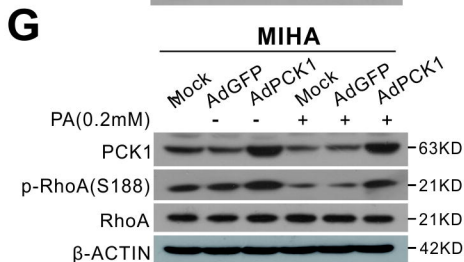

## H

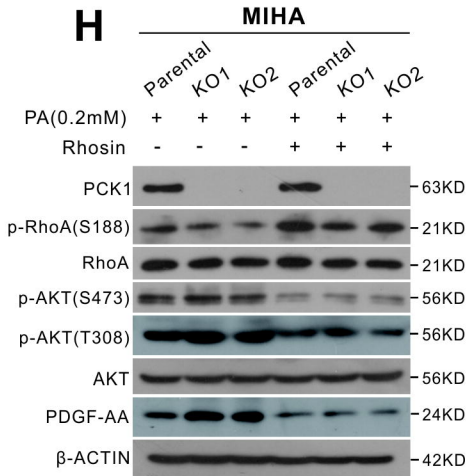

## I

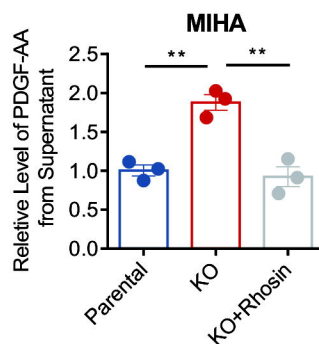

## J

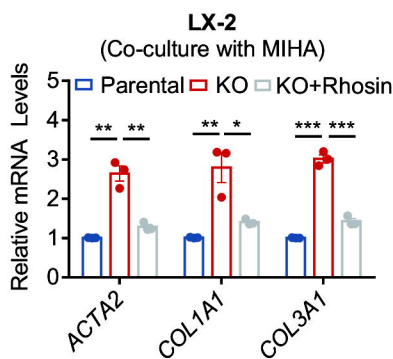

## K

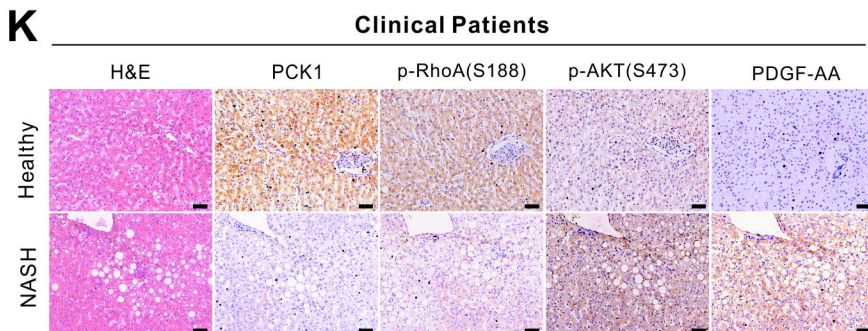

# Figure 7

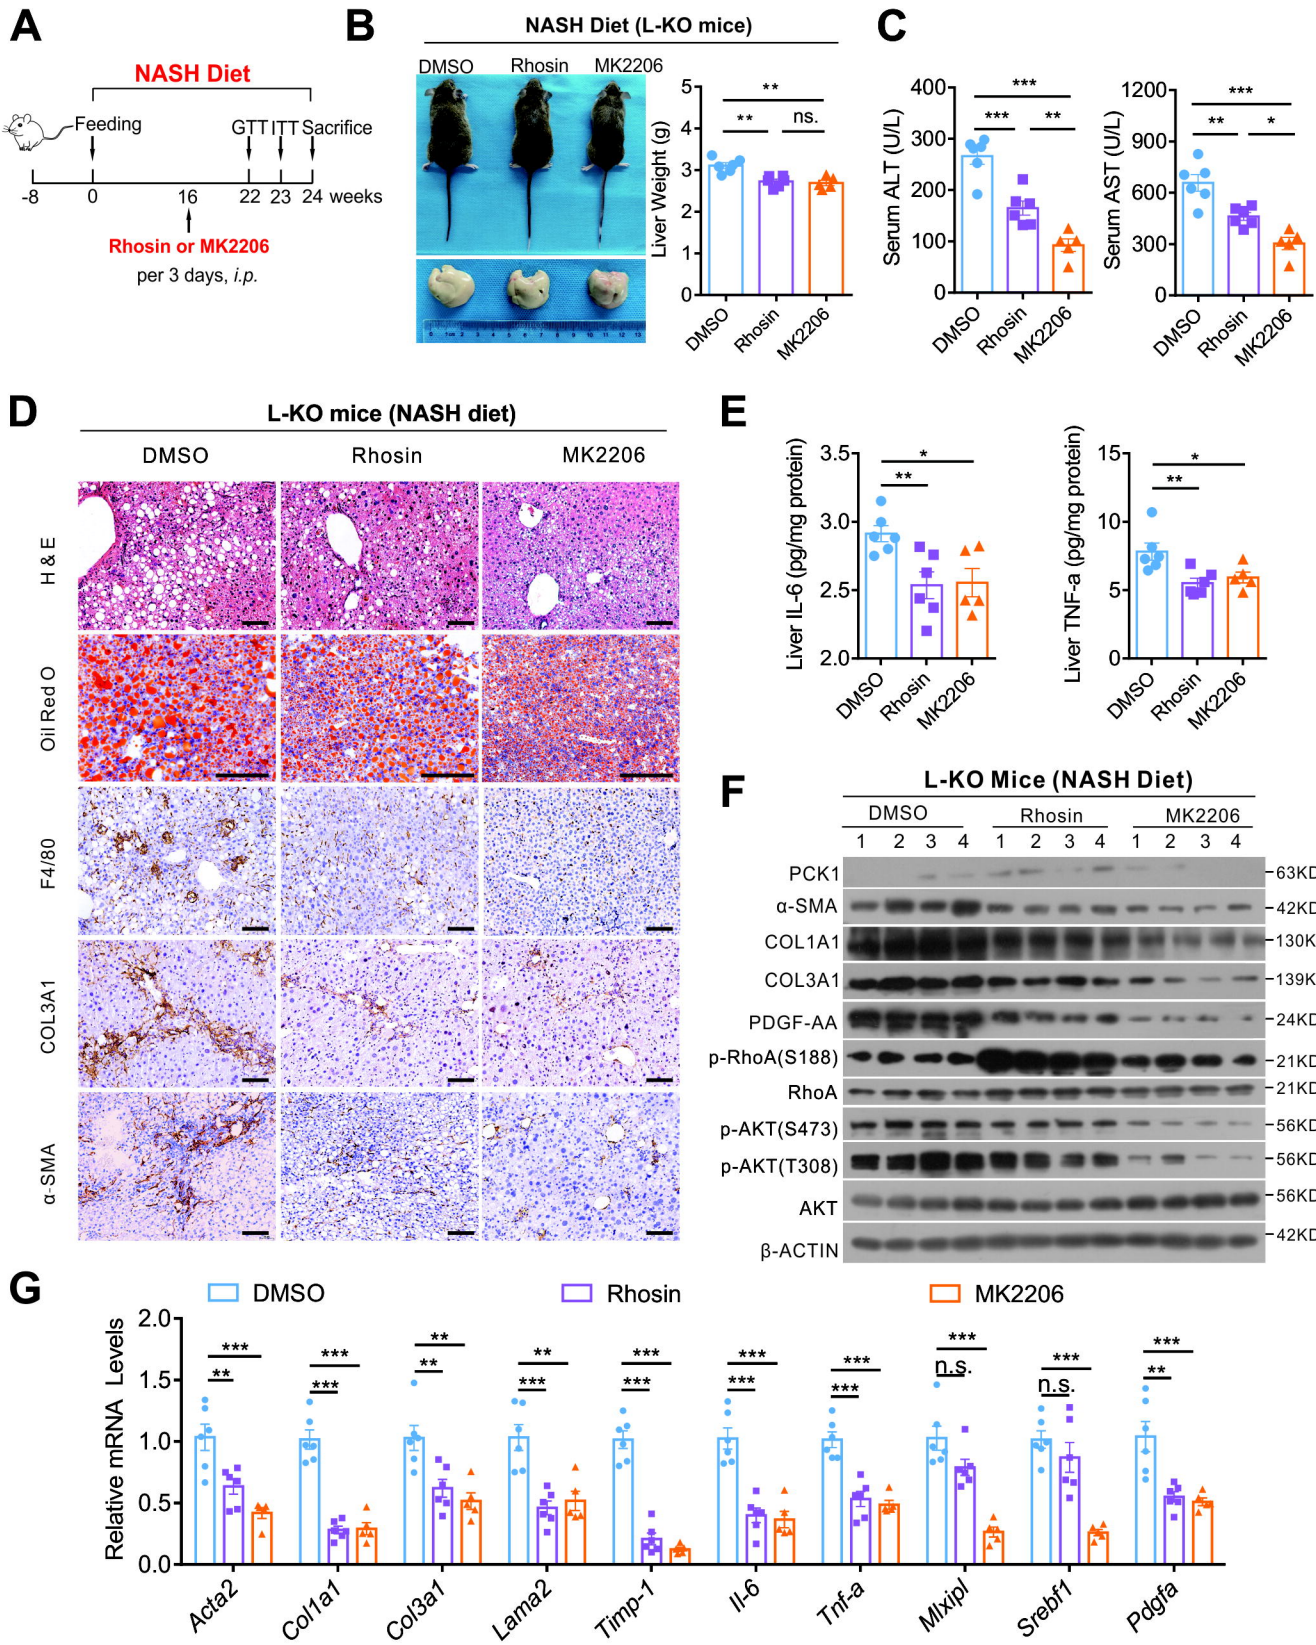

Source: https://www.biorxiv.org/content/10.1101/2021.01.12.426294v2.full.pdf
